# Supplementary material for: Tumor mutational burden in lung cancer: a systematic literature review
Source: PubMed Central journal article supplement (PMC6859921; doi:10.18632/oncotarget.27287), 2019-11-12
Supplement: oncotarget-10-6604-s001.pdf [file oncotarget-10-6604-s001.pdf]

# Tumor mutational burden in lung cancer: a systematic literature review

## SUPPLEMENTARY MATERIALS

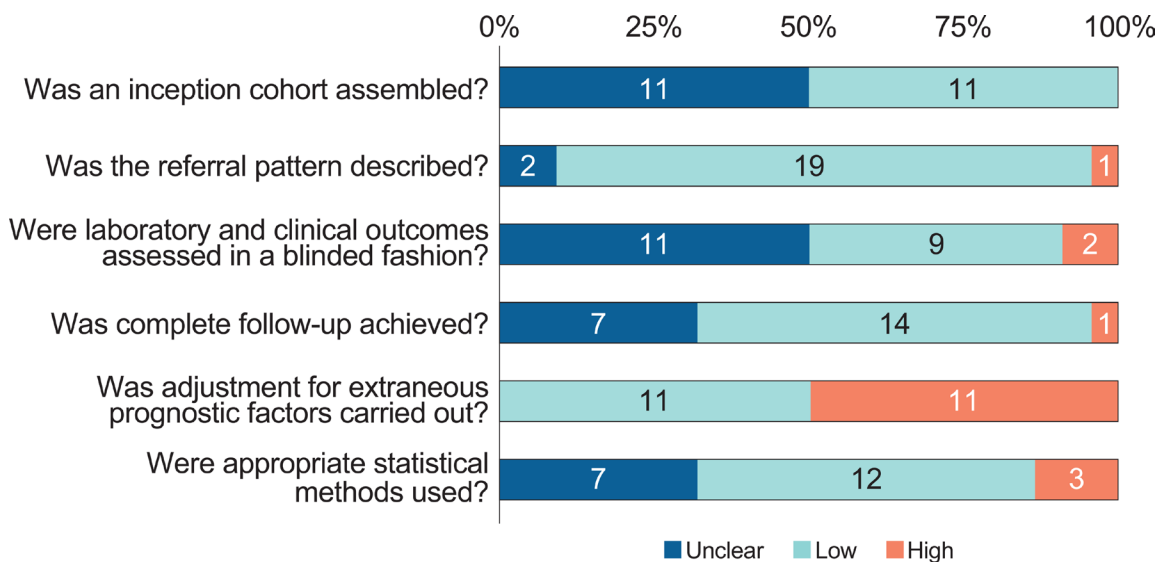

Supplementary Figure 1: Risk of bias results for clinical efficacy studies.

Supplementary Table 1: Full MEDLINE search strategy. See Supplementary Table 1

Supplementary Table 2: Full Emcare search strategy. See Supplementary Table 2

### Supplementary Table 3: Full EMBASE search strategy

|                                                                                                                                                                                                                                                                                                                                                                                                                                                                                                                                                                                                                                                                                                                                                                                                                                                                                                                                                                                                                                                                                                                                                                                                                                                                                                                                                                                                                                                                                                                                                                                                                                                                                                                                                                                                                                                                                                                                                                                                                                                                                                                                                                                                                                                                                                                                                                                                                                                                                                                                                                                                                                                                                                                                                                                                                                                                                                                                                                                                                                                                                                                                                                                                                                                                                                                                                                                                                                                                                                                                                                                                                                                                                                                                                                                                                                                                                                                                                                                                                                                                                                                                                                                                                                                                                                                                                                                                                                                                                                                                                                                                                                           |
|-------------------------------------------------------------------------------------------------------------------------------------------------------------------------------------------------------------------------------------------------------------------------------------------------------------------------------------------------------------------------------------------------------------------------------------------------------------------------------------------------------------------------------------------------------------------------------------------------------------------------------------------------------------------------------------------------------------------------------------------------------------------------------------------------------------------------------------------------------------------------------------------------------------------------------------------------------------------------------------------------------------------------------------------------------------------------------------------------------------------------------------------------------------------------------------------------------------------------------------------------------------------------------------------------------------------------------------------------------------------------------------------------------------------------------------------------------------------------------------------------------------------------------------------------------------------------------------------------------------------------------------------------------------------------------------------------------------------------------------------------------------------------------------------------------------------------------------------------------------------------------------------------------------------------------------------------------------------------------------------------------------------------------------------------------------------------------------------------------------------------------------------------------------------------------------------------------------------------------------------------------------------------------------------------------------------------------------------------------------------------------------------------------------------------------------------------------------------------------------------------------------------------------------------------------------------------------------------------------------------------------------------------------------------------------------------------------------------------------------------------------------------------------------------------------------------------------------------------------------------------------------------------------------------------------------------------------------------------------------------------------------------------------------------------------------------------------------------------------------------------------------------------------------------------------------------------------------------------------------------------------------------------------------------------------------------------------------------------------------------------------------------------------------------------------------------------------------------------------------------------------------------------------------------------------------------------------------------------------------------------------------------------------------------------------------------------------------------------------------------------------------------------------------------------------------------------------------------------------------------------------------------------------------------------------------------------------------------------------------------------------------------------------------------------------------------------------------------------------------------------------------------------------------------------------------------------------------------------------------------------------------------------------------------------------------------------------------------------------------------------------------------------------------------------------------------------------------------------------------------------------------------------------------------------------------------------------------------------------------------------------------------|
| <b>EMBASE. com</b>                                                                                                                                                                                                                                                                                                                                                                                                                                                                                                                                                                                                                                                                                                                                                                                                                                                                                                                                                                                                                                                                                                                                                                                                                                                                                                                                                                                                                                                                                                                                                                                                                                                                                                                                                                                                                                                                                                                                                                                                                                                                                                                                                                                                                                                                                                                                                                                                                                                                                                                                                                                                                                                                                                                                                                                                                                                                                                                                                                                                                                                                                                                                                                                                                                                                                                                                                                                                                                                                                                                                                                                                                                                                                                                                                                                                                                                                                                                                                                                                                                                                                                                                                                                                                                                                                                                                                                                                                                                                                                                                                                                                                        |
| <b>Search Date: Wed April 10 (18:02:06 UTC) 2018</b>                                                                                                                                                                                                                                                                                                                                                                                                                                                                                                                                                                                                                                                                                                                                                                                                                                                                                                                                                                                                                                                                                                                                                                                                                                                                                                                                                                                                                                                                                                                                                                                                                                                                                                                                                                                                                                                                                                                                                                                                                                                                                                                                                                                                                                                                                                                                                                                                                                                                                                                                                                                                                                                                                                                                                                                                                                                                                                                                                                                                                                                                                                                                                                                                                                                                                                                                                                                                                                                                                                                                                                                                                                                                                                                                                                                                                                                                                                                                                                                                                                                                                                                                                                                                                                                                                                                                                                                                                                                                                                                                                                                      |
| <pre>(((((non small cell lung cancer/mj OR 'large cell lung carcinoma'/mj OR 'lung adenocarcinoma'/mj OR 'squamous cell lung carcinoma'/mj OR 'lung cancer'/exp/mj) OR ((bronchial OR bronchus OR lung OR pleural OR pulmonary) NEAR/3 (adenocarcinoma* OR cancer OR cancers OR carcinom* OR carcinogenes* OR metasta* OR 'non small cell' OR 'large cell' OR 'squamous cell'))): ti, ab, kw) AND (((((tumor\$ OR tumour\$) NEAR/2 mutation*): ti, ab, kw) OR ((mutation* NEAR/2 (burden\$ OR load\$)): ti, ab, kw)) OR (landscape NEAR/2 mutation*): ti, ab, kw) OR ('monoclonal antibody'/mj OR ('monoclonal antibody mpdl 3280a': ti, ab, kw OR 'monoclonal antibody mpdl3280a': ti, ab, kw OR 'mpdl 3280a': ti, ab, kw OR 'mpdl3280a': ti, ab, kw OR 'rg 7446': ti, ab, kw OR 'rg7446': ti, ab, kw OR 'tecentriq': ti, ab, kw OR 'tecentriq': ti, ab, kw) OR (atezolizumab\$: ti, ab, kw OR 'avelumab\$: ti, ab, kw OR 'durvalumab\$: ti, ab, kw OR 'pembrolizumab\$: ti, ab, kw OR 'nivolumab\$: ti, ab, kw OR 'ipilimumab\$: ti, ab, kw) OR ('bavencio': ti, ab, kw OR 'msb 0010682': ti, ab, kw OR 'msb 0010718c': ti, ab, kw OR 'msb 10682': ti, ab, kw OR 'msb 10718c': ti, ab, kw OR 'msb0010682': ti, ab, kw OR 'msb0010718c': ti, ab, kw OR 'msb10682': ti, ab, kw OR 'msb10718c': ti, ab, kw OR 'imfinzi': ti, ab, kw OR 'medi 4736': ti, ab, kw OR 'medi4736': ti, ab, kw OR 'keytruda': ti, ab, kw OR 'lambrolizumab': ti, ab, kw OR 'mk 3475': ti, ab, kw OR 'mk3475': ti, ab, kw OR 'bms 936558': ti, ab, kw OR 'bms936558': ti, ab, kw OR 'mdx 1106': ti, ab, kw OR 'mdx1106': ti, ab, kw OR 'ono 4538': ti, ab, kw OR 'ono4538': ti, ab, kw OR 'opdivo': ti, ab, kw OR 'bms 734016': ti, ab, kw OR 'bms734016': ti, ab, kw OR 'mdx 010': ti, ab, kw OR 'mdx 101': ti, ab, kw OR 'mdx010': ti, ab, kw OR 'mdx101': ti, ab, kw OR 'strentarga': ti, ab, kw OR 'yervoy': ti, ab, kw) OR ('atezolizumab'/de OR 'avelumab'/de OR 'durvalumab'/de OR 'pembrolizumab'/mj OR 'nivolumab'/mj OR 'ipilimumab'/mj)) OR ('cytotoxic t lymphocyte antigen 4'/mj OR ('antigen\$ cd152': ti, ab, kw OR 'cd152 antigen\$': ti, ab, kw OR 'ctla 4': ti, ab, kw OR 'cytotoxic t lymphocyte associated antigen 4': ti, ab, kw OR 'ctla4': ti, ab, kw)))) AND (('clinical study'/mj OR 'clinical trial'/mj OR 'controlled clinical trial'/mj OR 'controlled study'/mj OR 'major clinical study'/mj OR 'randomized controlled trial'/mj OR 'control group'/mj OR (((clinical OR randomi* OR controlled OR multicentre OR multicenter OR 'multi centre' OR 'multi center') NEAR/3 (study OR trial)): ti, ab) OR placebo: ab, ti OR 'head to head': ti, ab) OR 'panel study'/exp OR ('comparative study'/exp/mj OR 'controlled study'/exp/mj OR 'experimental study'/exp/mj OR 'observational study'/mj OR 'panel study'/mj OR 'quasi experimental study'/mj OR 'clinical study'/exp/mj) OR ('open label': ti, ab, kw OR 'open study': ti, ab, kw) OR (phase NEAR/2 (i OR ii OR iii OR iv OR '1' OR '2' OR '3' OR '4') NEAR/3 (study OR trial)): ti, ab, kw OR ((time OR times) NEAR/2 (duration\$ OR frame OR frames OR period\$ OR point\$) NEAR/3 (over OR multiple OR three OR four OR five OR six OR seven OR eight OR nine OR ten OR eleven OR twelve OR month* OR hour\$ OR day\$ OR 'more than')): ti, ab, kw OR (before NEAR/3 after): ti, ab, kw OR ((before OR after) NEAR/5 during): ti, ab, kw OR cohort\$: ti, ab, kw OR ('adverse event\$': ti, ab, kw OR 'adverse effect\$': ti, ab, kw) OR (analys*: ti, ab, kw OR design\$: ti, ab, kw OR investigation\$: ti, ab, kw OR study: ti, ab, kw OR studies: ti, ab, kw OR trial: ti, ab, kw OR trials: ti, ab, kw) OR ((case OR cases OR 'cba' OR control* OR historical OR crosssection* OR 'cross section*' OR crossection* OR epidemiolog* OR etiolog* OR followed OR 'follow-up' OR followup* OR longitudinal* OR retrospectiv* OR registry OR registries OR risk OR 'risk factor' OR prognostic OR observational* OR prospectiv*) NEAR/3 (study OR studies OR trial OR trials OR investigation* OR analys*)): ti, ab, kw) NOT (('animal'/exp OR 'invertebrate'/exp OR 'animal experiment'/exp OR 'animal model'/exp OR 'animal tissue'/exp OR 'animal cell'/exp OR 'nonhuman'/de) NOT (('animal'/exp OR 'invertebrate'/exp OR 'animal experiment'/exp OR 'animal model'/exp OR 'animal tissue'/exp OR 'animal cell'/exp OR 'nonhuman'/de) AND ('human'/exp OR 'human cell'/de)))) AND (2011: py OR 2012: py OR 2013: py OR 2014: py OR 2015: py OR 2016: py OR 2017: py OR 2018: py)) AND [english]/lim NOT ('conference abstract'/it OR 'conference review'/it) 1605</pre> |

### Supplementary Table 4: Measures reported by publications presenting efficacy, biomarkers or patient/disease characteristics data. See Supplementary Table 4

**Supplementary Table 5: Publications reporting additional efficacy outcomes**

|                                                                                                 | Main findings relating to TMB and respective outcome                                                                          | <i>P</i> value |
|-------------------------------------------------------------------------------------------------|-------------------------------------------------------------------------------------------------------------------------------|----------------|
| <b>DURABLE CLINICAL BENEFIT</b>                                                                 |                                                                                                                               |                |
| Roszik 2016 [39]                                                                                |                                                                                                                               |                |
| Pembrolizumab                                                                                   | DCB rate higher in patients with TMB-H (63%) vs TMB-L (0%)                                                                    | NR             |
| Hellmann 2017 [34]                                                                              |                                                                                                                               |                |
| PD-L1 inhibitor +/- antiCTLA-4 therapy                                                          | TMB higher in patients with DCB (10.2 mut/Mb) vs no DCB (7.1 mut/Mb)                                                          | .02            |
| Mahadevan 2017 [36]                                                                             |                                                                                                                               |                |
| PD-1 inhibitors ( <i>n</i> = 82), PD-L1 inhibitors ( <i>n</i> = 5) other agents ( <i>n</i> = 7) | TMB higher in patients with DCB (12 mut/Mb) than no DCB (8 mut/Mb)                                                            | .0027          |
| Rizvi 2015 [1]                                                                                  |                                                                                                                               |                |
| Pembrolizumab (cohort 1)                                                                        | TMB higher in patients with DCB (302 mut) than no DCB (148 mut)                                                               | .02            |
| Pembrolizumab (cohort 2)                                                                        | TMB higher in patients with DCB (244 mut) than no DCB (125 mut)                                                               | .04            |
| <b>DISEASE CONTROL RATE</b>                                                                     |                                                                                                                               |                |
| Singal 2017 [41]                                                                                |                                                                                                                               |                |
| Nivolumab                                                                                       | DCR higher in patients with TMB-H (100%) vs TMB-L (62%)                                                                       | .03            |
| Hu 2018 [35]                                                                                    |                                                                                                                               |                |
| PD-1/PD-L1 inhibitors                                                                           | DCR 100% in patients with TMB-H                                                                                               | NR             |
| <b>DURATION OF TREATMENT</b>                                                                    |                                                                                                                               |                |
| Singal 2017 [41]                                                                                |                                                                                                                               |                |
| Nivolumab                                                                                       | DoT was longer in patients with TMB-H (7.5 months) vs TMB-L (4.6 months)                                                      | .001           |
| Ross 2017 [45]                                                                                  |                                                                                                                               |                |
| Immune checkpoint inhibitors                                                                    | DoT was longer in patients with TMB-H vs TMB-L (no values reported)                                                           | .001           |
| <b>RECIST CRITERIA</b>                                                                          |                                                                                                                               |                |
| Rozenblum 2017 [40]                                                                             |                                                                                                                               |                |
| Pembrolizumab and nivolumab                                                                     | Mean TMB in patients with:<br>–Partial response: 9.6 mut/Mb<br>–Stable disease 3.6 mut/Mb<br>–Progressive disease: 6.1 mut/Mb | NR             |

Abbreviations: DCB, durable clinical benefit; DoT, duration on therapy; mut/Mb, mutations per DNA megabase; PD-1, programmed cell death-1; PD-L1, programmed death ligand 1; TMB, tumor mutational burden; TMB-H, high TMB; TMB-L, low.
